# Supplementary material
Source: publisher figshare collection journal article supplement (https://gsajournals.figshare.com/ndownloader/files/12725171)
Supplement: Supplementary file 1 [file 12725171]

## Sheet: Table S10-AsmDiffAfterPolishing
Table S11: Differences in assembly statistics between initial assembly and either Racon-only or Pilon-only polished assemblies.
	Difference from initial non-polished assembly
After Racon	Difference After	Assembly Size (bp)	Contigs	N50 (bp)	Contigs >100Kb	Contigs >1Mb
D. ananassae	Racon x4	756633	0	14206	0	0
D. biarmipes	Racon x4	-1926055	-5	-29734	-2	-1
D. bipectinata	Racon x4	3271449	0	14683	2	1
D. erecta	Racon x4	2611992	0	329674	0	0
D. eugracilis	Racon x4	3279939	-1	26119	4	1
D. mauritiana	Racon x4	2010060	-7	77805	1	0
D. mojavensis	Racon x4	6032161	0	172967	3	1
D. persimilis	Racon x4	-1300240	-1	-23501	-2	-1
D. pseudoobscura	Racon x4	-1200503	0	-14942	-1	0
D. sechellia	Racon x4	4435806	-1	255406	0	0
D. simulans	Racon x4	1438706	0	84576	0	0
D. triauraria	Racon x4	2968610	0	19408	3	1
D. virilis	Racon x4	3533750	0	91455	0	0
D. willistoni	Racon x4	-1609696	-1	-16708	-2	0
D. yakuba	Racon x4	1955491	0	57080	0	2
Average	Racon x4	2.03643e+06	-1	68930.6	0.5625	0.3125
D. ananassae	Pilon x6	-1205304	0	3587	-3	0
D. biarmipes	Pilon x6	-3150014	0	35675	-7	-1
D. bipectinata	Pilon x6	781146	0	18871	0	0
D. erecta	Pilon x6	1751938	0	249883	0	0
D. eugracilis	Pilon x6	1019054	0	65306	-4	0
D. mauritiana	Pilon x6	1122017	0	25400	-1	0
D. mojavensis	Pilon x6	3593808	0	140193	1	1
D. persimilis	Pilon x6	-2134496	0	-32012	-1	-1
D. pseudoobscura	Pilon x6	-1665920	0	-19932	-6	0
D. sechellia	Pilon x6	2836218	0	227708	0	0
D. simulans	Pilon x6	166761	0	206120	-1	0
D. triauraria	Pilon x6	1436494	0	14290	1	1
D. virilis	Pilon x6	1273862	0	57007	0	0
D. willistoni	Pilon x6	-3117370	0	-14293	-6	-1
D. yakuba	Pilon x6	919564	0	40052	0	-1
Average	Pilon x6	246418	0	64357.9	-1.625	-0.1875
